# Supplementary material for: CRISPR/Cas9-Mediated Generation of Guangxi Bama Minipigs Harboring Three Mutations in α-Synuclein Causing Parkinson’s Disease
Source: PubMed Central journal article supplement (PMC6102220; doi:10.1038/s41598-018-30436-3), 2018-08-20
Supplement: 41598_2018_30436_MOESM1_ESM.pdf [file 41598_2018_30436_MOESM1_ESM.pdf]

---

## Supplementary Information

### CRISPR/Cas9-Mediated Generation of Guangxi Bama Minipigs Harboring Three Mutations in $\alpha$ -Synuclein Causing Parkinson's Disease

Xiang-Xing Zhu<sup>1,\*,+</sup>, Yi-Zhi Zhong<sup>2,+</sup>, Yao-Wen Ge<sup>3</sup>, Ke-Huan Lu<sup>1</sup> & Sheng-Sheng Lu<sup>1,\*</sup>

<sup>1</sup>State Key Laboratory for Conservation and Utilization of Subtropical Agro-Bioresources; Guangxi High Education Key Laboratory for Animal Reproduction and Biotechnology; College of Animal Science and Technology, Guangxi University, Nanning 530004, China.

<sup>2</sup>Guangxi Nanning Yanleshang Biotechnology Co. LTD, Nanning 530004, China.

<sup>3</sup>Wuhan ViaGen Animal Breeding Resources Development Company, Wuhan 430073, China.

\*Correspondence and requests for materials should be addressed to S.S.L. (E-mail: shengshenglu@sina.com) or X.X.Z. (E-mail: zhu\_xiangxing@126.com).

+These authors contributed equally to this work.

#### Contents:

Supplementary Table S1

Supplementary Fig. S1

Supplementary Fig. S2

Supplementary Fig. S3

Supplementary Fig. S4

Full-length gel picture of Fig. 1B

Full-length gel picture of Fig. 2B Upper gel

Full-length gel picture of Fig. 2B Lower gel

Full-length gel picture of Fig. 2D

Full-length gel picture of Fig. S2 Upper gel

Full-length gel picture of Fig. S2 Middle gel

Full-length gel picture of Fig. S2 Lower gel

Full-length gel picture of Fig. S3A Left gel

Full-length gel picture of Fig. S3A Middle gel

Full-length gel picture of Fig. S3A Right gel

31 **Supplementary Table S1 Off-target sites used for analysis of off-target mutations in gene-edited cell colonies**

| Off-target No. | Chr.    | Strand | Position  | Sequence*                                 | Score       | Gene                    | Primers for PCR and sequencing                       | Amplicon (bp) |
|----------------|---------|--------|-----------|-------------------------------------------|-------------|-------------------------|------------------------------------------------------|---------------|
| sgRNA          | Chr. 8  | 1      | 138648226 | ACCAAGGAAGGAGTGGTTCAT <u>GG</u>           | 100         | NCBI Gene ID:<br>641350 | -                                                    | -             |
| Off-target 1#  | Chr. 1  | -1     | 84002721  | AACA <u>GG</u> GGAAGGAGTGGTTCAG <u>GG</u> | 5.722891566 | None                    | PF: GATGGATAGATCTTGTCTGG<br>PR: CGATTCCAGGACTCTTAGAG | 504           |
| Off-target 2#  | Chr. 18 | -1     | 20227588  | GAGATGGAAGGAGTGGTTCAT <u>GG</u>           | 1.30580855  | None                    | PF: GGATACACGTACATGCAGTC<br>PR: TCACCAAGGATCTCACCATG | 451           |
| Off-target 3#  | Chr. 6  | 1      | 27376728  | ACCAAGGTAGGAGT <u>CAG</u> TCAGAG          | 0.025390982 | NCBI Gene ID:<br>397478 | PF: TACAGTGCAGCTCAGAGAGG<br>PR: ACCTAGCATCCAGCTCAAAC | 531           |

32 \*Red letters are showing the unmatched nucleotides in off-target sequences aligned to sgRNA. PAM sequences are labeled with underline.

|                     |     |            |            |            |            |            |
|---------------------|-----|------------|------------|------------|------------|------------|
| <b>Homa sapiens</b> | 001 | MDVFMKGLSK | AKEGVVAAAE | KTKQGVAEAA | GKTKEGVLYV | GSKTKEGVVH |
| <b>Bama minipig</b> | 001 | MDVFMKGLSK | AKEGVVAAAE | KTKQGVAEAA | GKTKEGVLYV | GSKTKEGVVH |
| <b>Homa sapiens</b> | 051 | GVATVAEKT  | EQVTNVGGAV | VTGVTAVAQK | TVEGAGSIAA | ATGFVKKDQL |
| <b>Bama minipig</b> | 051 | GVITVAEKT  | EQVTNVGEAV | VTGVTAVAQK | TVEGAGSIAA | ATGFGKKDQL |
| <b>Homa sapiens</b> | 101 | GKNEEGAPQE | GILEDMPVDP | DNEAYEMPSE | EGYQDYEPEA |            |
| <b>Bama minipig</b> | 101 | GKNEEGAPQE | GILEDMPVDP | DNEAYEMPSE | EGYQDYEPEA |            |

33

34 Supplementary Fig. S1 Alignment of  $\alpha$ -synuclein protein sequences of human (*Homa sapiens*; NCBI Gene No.35 6622) and *Bama minipig*. Caged residues are showing SNCA mutations (A30P, E46K, H50Q, G51D and A53T)36 causing human Parkinson's disease (PD). Notice that the porcine  $\alpha$ -synuclein normally contains a threonine (T)

37 at position 53, indicating A53T which cause PD in human will not be functional in pigs. Residues not

38 evolutionary conserved are marked in red.

39

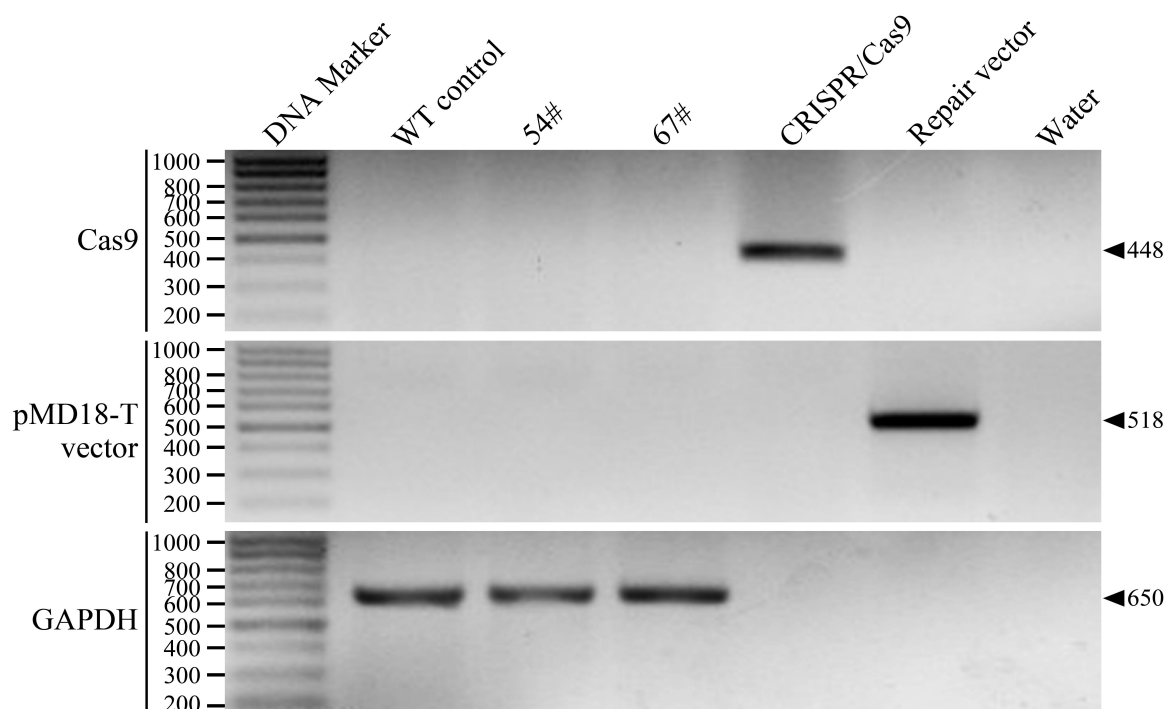

40

41 **Supplementary Fig. S2 PCR amplification of Cas9 and repair vector confirmed no integration of**42 **exogenous genes in gene-edited cell colonies.** Plasmids were represented as positive control, and wild-type

43 (WT) cells were represented as negative control. GAPDH was used to confirm the DNA quality of all the

44 samples.

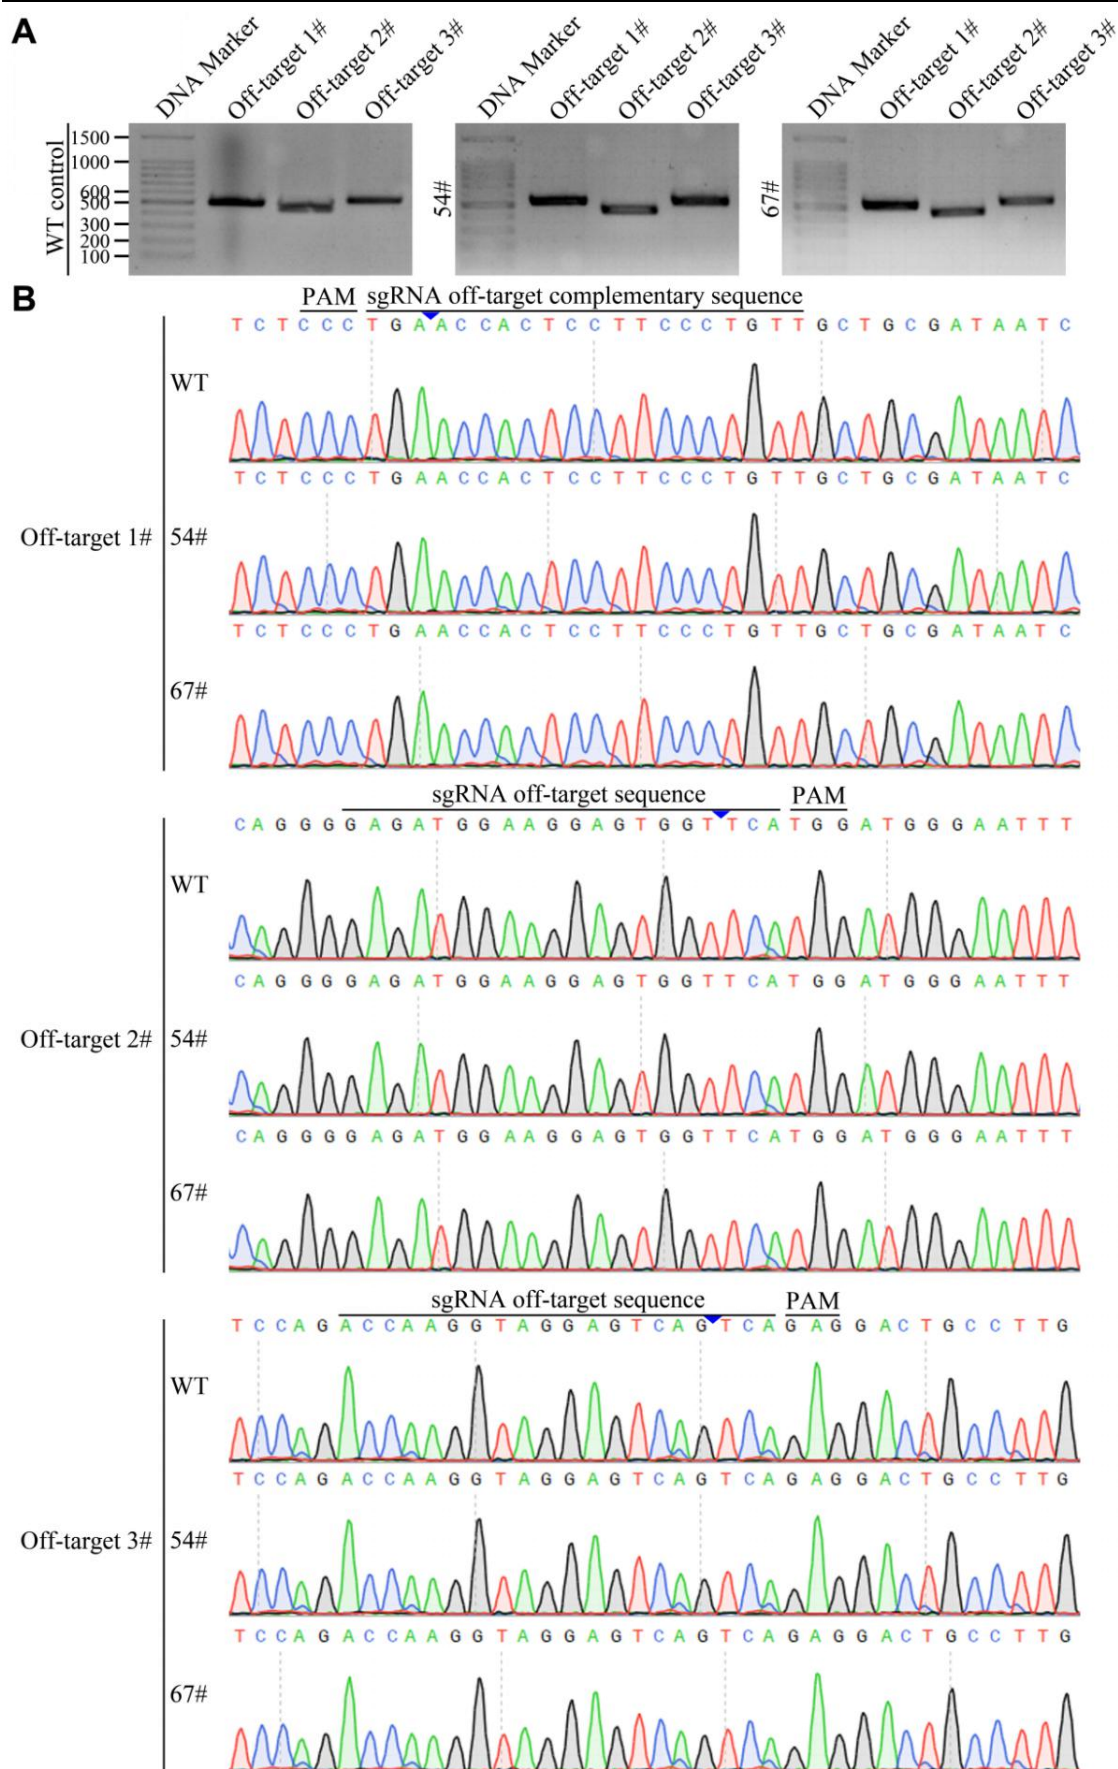

45

46 **Supplementary Fig. S3 Analysis of the off-target effects by DNA sequencing.** (A) PCR amplifications were

47 performed with two gene-edited cell colonies in three off-target loci (Off-target 1#~3#). (B) DNA sequencing  
 48 suggested no mutations were occurred in all of the detected off-target loci in these two positive gene-edited cell  
 49 colonies. The predicted cleavage sites in off-target sequences were marked with blue triangles.

50

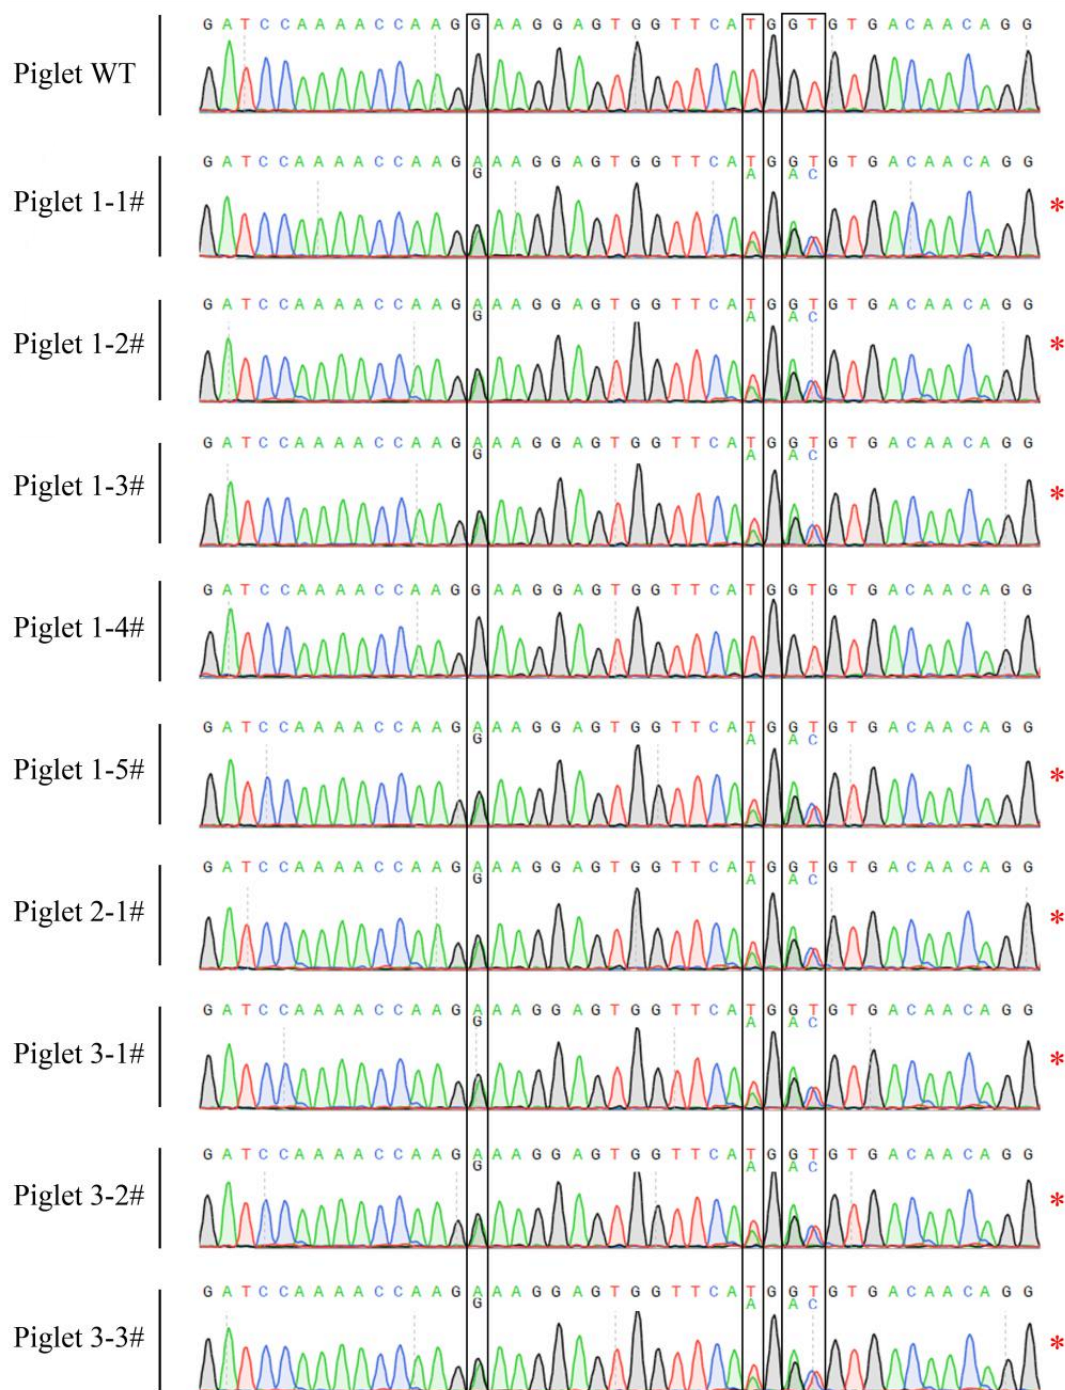

51

52 **Supplementary Fig. S4 DNA sequencing confirmed that the cloned Guangxi Bama minipigs harboring**

53 **designed mutations in *SCNA* locus.** One wild-type (WT) pig was used as negative control, and 8 mutant

54 minipigs were marked with red asterisks.



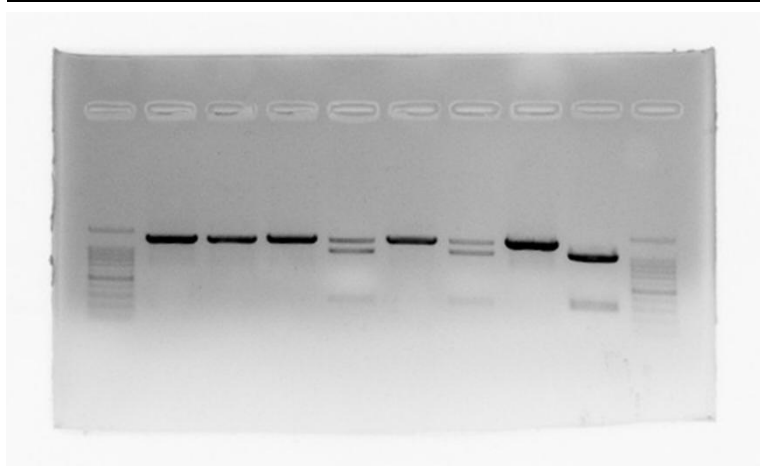

55

56 **Full-length gel picture of Fig. 1B**

57

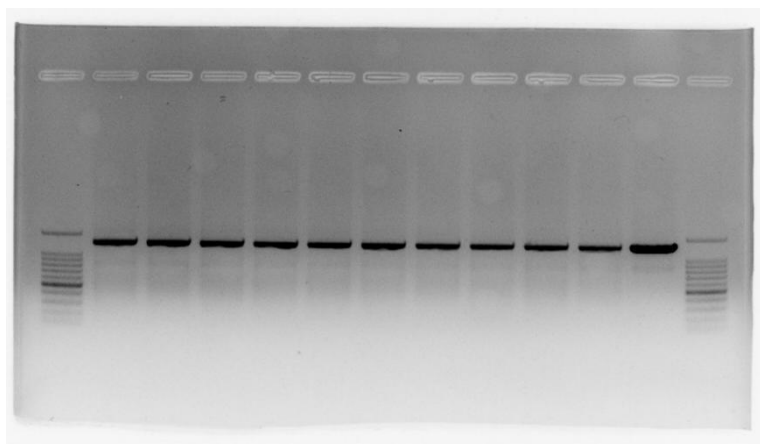

58

59 **Full-length gel picture of Fig. 2B Upper gel**

60

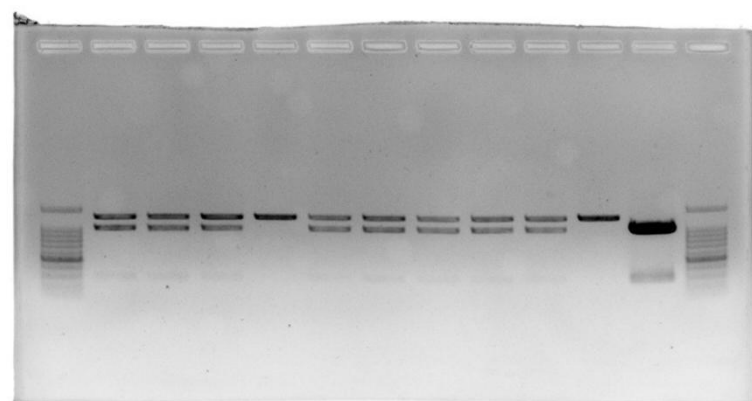

61

62 **Full-length gel picture of Fig. 2B Lower gel**

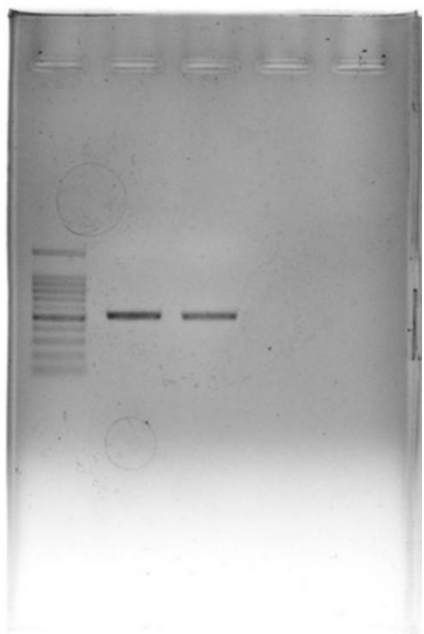

63

64 **Full-length gel picture of Fig. 2D**

65

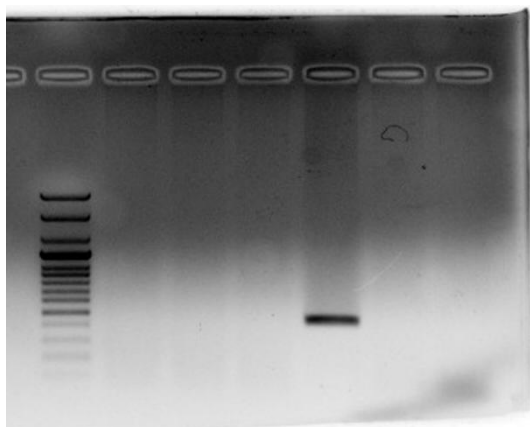

66

67 **Full-length gel picture of Fig. S2 Upper gel**

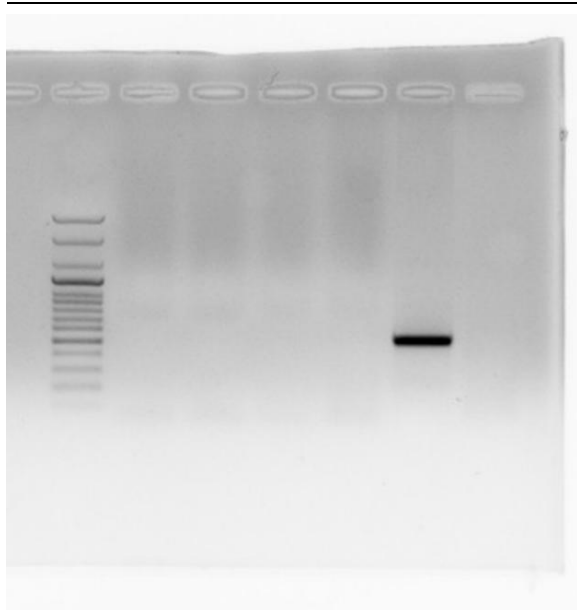

68

69 **Full-length gel picture of Fig. S2 Middle gel**

70

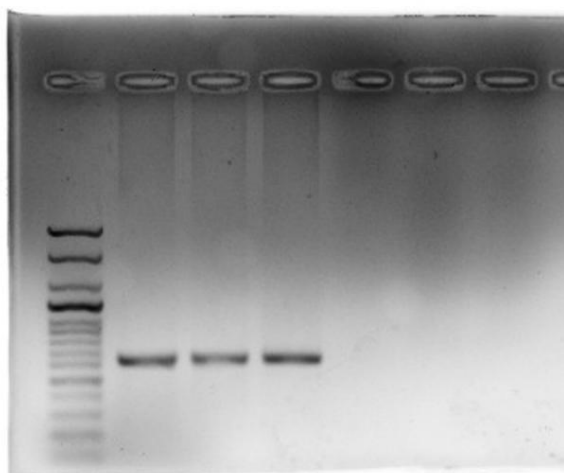

71

72 **Full-length gel picture of Fig. S2 Lower gel**



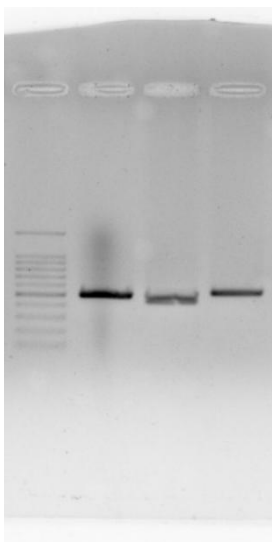

73

74 **Full-length gel picture of Fig. S3A Left gel**

75

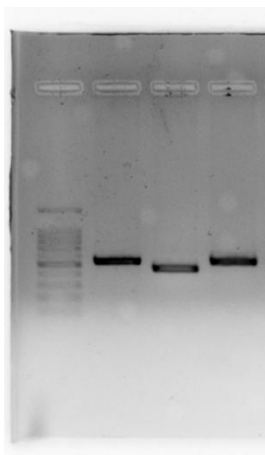

76

77 **Full-length gel picture of Fig. S3A Middle gel**

78

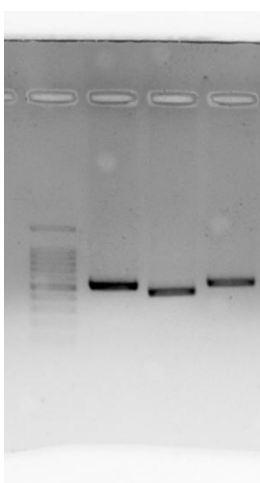

79

80 **Full-length gel picture of Fig. S3A Right gel**
